1 **Coexistence with *Pseudomonas aeruginosa* alters *Staphylococcus aureus* transcriptome,**  
2 **antibiotic resistance and internalization into epithelial cells**

3

4 Paul Briaud<sup>1</sup>, Laura Camus<sup>1</sup>, Sylvère Bastien<sup>1</sup>, Anne Doléans-Jordheim<sup>3</sup>, François  
5 Vandenesch<sup>1,2,3</sup> and Karen Moreau<sup>1\*</sup>.

6

7 <sup>1</sup>CIRI, *Centre International de Recherche en Infectiologie*, Inserm U1111, Université Lyon1,  
8 Ecole Normale Supérieure de Lyon, CNRS UMR5308, Lyon, France.

9 <sup>2</sup>Centre National de Référence des Staphylocoques, Hospices Civils de Lyon, Lyon, France.

10 <sup>3</sup> Institut des agents infectieux, Hospices Civils de Lyon, Lyon, France.

11

12 Running title: *P. aeruginosa* alters *S. aureus* transcriptome

13

14 \* Address correspondence to Karen Moreau, [karen.moreau@univ-lyon1.fr](mailto:karen.moreau@univ-lyon1.fr)

15 **ABSTRACT**

16 Cystic fibrosis (CF) is the most common life-threatening genetic disease among Caucasians. CF  
17 patients suffer from chronic lung infections due to the presence of thick mucus, caused by *cftr*  
18 gene dysfunction. The two most commonly found bacteria in the mucus of CF patients are  
19 *Staphylococcus aureus* and *Pseudomonas aeruginosa*. It is well known that early-infecting *P.*  
20 *aeruginosa* strains produce anti-staphylococcal compounds and inhibit *S. aureus* growth. More  
21 recently, it has been shown that late-infecting *P. aeruginosa* strains develop commensal-  
22 like/coexistence interaction with *S. aureus*. The aim of this study was to decipher the impact of *P.*  
23 *aeruginosa* strains on *S. aureus*. RNA sequencing analysis showed 77 genes were specifically  
24 dysregulated in the context of competition and 140 genes in the context of coexistence in the  
25 presence of *P. aeruginosa*. In coexistence, genes encoding virulence factors and proteins  
26 involved in carbohydrates, lipids, nucleotides and amino acids metabolism were downregulated.  
27 On the contrary, several transporter family encoding genes were upregulated. In particular,  
28 several antibiotic pumps belonging to the Nor family were upregulated: *tet38*, *norA* and *norC*,  
29 leading to an increase in antibiotic resistance of *S. aureus* when exposed to tetracycline and  
30 ciprofloxacin and an enhanced internalization rate within epithelial pulmonary cells. This study  
31 shows that coexistence with *P. aeruginosa* affects the *S. aureus* transcriptome and virulence.

## 32 INTRODUCTION

33  
34 Most microorganisms are frequently embedded within communities of mixed species where  
35 different microbial interactions can occur between individual species. In the case of infection,  
36 these interactions between species can influence pathogenic behavior such as virulence, biofilm  
37 formation and antibiotic tolerance <sup>1-4</sup>.

38 One of the most well-known examples of pathologies in which many bacterial interactions are  
39 described are lung diseases occurring during Cystic Fibrosis (CF). The airways of CF patients are  
40 colonized by multiple microorganisms whose prevalence varies with the age of the patients.  
41 Among them, *Staphylococcus aureus* and *Pseudomonas aeruginosa* are the most prevalent  
42 pathogens and are acquired in subsequent order. The typical pattern of chronic infection  
43 establishment begins with the early acquisition of *S. aureus*, (60% prevalence among children  
44 aged <2 years and the highest prevalence in children of 11-17 years (80%)), while prevalence  
45 slowly declines in adults (50%) <sup>5</sup>. In contrast, infections by *P. aeruginosa* occur later with the  
46 highest prevalence in adults (70% among 35-44-year-old patients). Although these bacteria seem  
47 to succeed one another, they are not mutually exclusive since patients are frequently diagnosed as  
48 being co-infected by *S. aureus* and *P. aeruginosa* (from 35% to 50%) <sup>6,7</sup>.

49 While *P. aeruginosa* is recognized as the leading cause of lung function decline, the significance  
50 of *S. aureus* in the course of CF disease is still being debated. It has been shown that one of the  
51 risk factors for initial *P. aeruginosa* airway infection includes *S. aureus* pre-colonization <sup>8-10</sup>.  
52 However, the impact of coinfection by the two pathogens on the evolution of the disease remains  
53 unclear <sup>11-13</sup>.

54 *S. aureus* and *P. aeruginosa* have been identified in the same lobe of CF lungs <sup>14,15</sup>, suggesting  
55 that both pathogens are present in the same niche and can in fact interact *in vivo*. Interactions

56 have been widely studied and it is commonly admitted that *P. aeruginosa* outcompetes *S. aureus*.  
57 Different mechanisms have been described<sup>16</sup>: for example, *P. aeruginosa* secreted products can  
58 inhibit the growth or lyse *S. aureus* as well as induce epithelial cells to kill *S. aureus* and other  
59 Gram-positive bacteria<sup>8,17,18</sup>.

60 However, these interactions can evolve during chronic colonization. Indeed, *P. aeruginosa* strains  
61 isolated from early infection outcompete *S. aureus*, as previously described, while strains isolated  
62 from chronic infection are less aggressive and can be co-cultivated with *S. aureus*<sup>19,20</sup>.  
63 Furthermore, *P. aeruginosa* isolates from mono-infected patients are more competitive towards *S.*  
64 *aureus* than isolates from coinfecting patients<sup>21</sup>.

65 In contrast to antagonistic interactions, nothing is known about the effects of *P. aeruginosa* and  
66 *S. aureus* interactions in this context of coexisting bacteria within the same infectious niche.  
67 Using a transcriptomic approach, we analyzed how co-cultivation with non-competitive *P.*  
68 *aeruginosa* altered *S. aureus* gene expression, especially genes encoding Nor family efflux  
69 pumps. In the presence of *P. aeruginosa*, over-expression of these genes increased *S. aureus*  
70 antibiotic tolerance and the rate of internalization into epithelial cells, two key determinants of  
71 chronic infection.

72

73 **RESULTS**

74 **Coexistence interaction involves more than half of the *S. aureus* and *P. aeruginosa* isolates**  
75 **from co-infected CF patients.**

76 Two types of interactions between *S. aureus* and *P. aeruginosa* could be observed with CF  
77 patient isolates: the well-described competitive phenotype, where *P. aeruginosa* inhibits *S.*  
78 *aureus* growth,<sup>16</sup> and the newly described phenotype of coexistence, where *P. aeruginosa* is  
79 unable to outcompete *S. aureus*<sup>19-21</sup>. In order to quantify the importance of this last phenotype,  
80 we collected 50 pairs of *S. aureus* and *P. aeruginosa* from 36 co-infected CF patients. The  
81 interaction between the two pathogens was analyzed by a competitive test on trypticase soy agar  
82 (TSA) plates (Table 1 - fig. 1A). We observed that 61% of strain pairs presented a coexistence  
83 phenotype whereas 39% were in competitive interaction. To determine whether the pairs of  
84 coexisting strains and competitive strains were phenotypically different, we measured colony  
85 size, analyzed the hemolytic properties of each strain, and searched for pigmentation and mucoid  
86 phenotype for all *P. aeruginosa* strains. No significant differences were observed between  
87 coexisting and competitive strains with respect to pigment production, mucoid phenotype and  
88 hemolysis (fig. S1). We observed a significant difference in the size of *S. aureus* colonies in  
89 which those of coexisting strains were larger than those of competition strains after 24 h of TSA  
90 plate culture. The significance of such a difference and its impact on interaction with *P.*  
91 *aeruginosa* remain to be explored. As others have already described that early infectious strains  
92 of *P. aeruginosa* are more aggressive for *S. aureus* than the late infectious strains<sup>19,20</sup>, we  
93 wondered if the type of interaction could be related to the duration of colonization. To answer  
94 this question, we determined the duration of co-colonization of *S. aureus* and *P. aeruginosa* for  
95 each patient. The average duration of colonization for coexisting strains was  $744.8 \pm 97.64$  days

96 and for competing strains  $941.2 \pm 137$  days. The difference was statistically non-significant (fig.  
97 S1).

98 Planktonic cultures were conducted on two pairs of strains: one competitive pair  
99 (SA2597/PA2596) and one coexisting pair (SA2599/PA2600). In both cases, we observed that *P.*  
100 *aeruginosa* growth was not altered by *S. aureus*. On the other hand, in the case of the competitive  
101 pair, *P. aeruginosa* had a negative effect on *S. aureus* growth after 4 hours of coculture (Fig 1B).  
102 Agar plate competition assays mixing respectively PA2600 (from coexisting pair) and PA2596  
103 (from competitive pair) with both SA2597 and SA2599 were performed (fig. 1A). PA2596  
104 outcompeted both SA strains whereas PA2600 was unable to inhibit any of the *S. aureus* strains,  
105 suggesting that the interaction phenotype is dependent on the *P. aeruginosa* strains. These results  
106 were confirmed with other combinations of strains (fig. S2).

107  
108 ***P. aeruginosa* differentially dysregulates *S. aureus* transcriptome according to**  
109 **coexistence/competition**

110 To obtain an overview of the impact of *P. aeruginosa* on the expression of *S. aureus* genes, a  
111 comparative transcriptomic study was conducted between SA2597 and SA2599 in monocultures,  
112 and the same strains in coculture with a competition PA strain (PA2596) and a coexisting PA  
113 strain (PA2600). Thus, for each interaction state, we tested two pairs of strains, namely SA2597 /  
114 PA2596 and SA2599 / PA2596 for the competition and the SA2597 / PA2600 and SA2599 /  
115 PA2600 pairs for coexistence. Gene expression was considered dysregulated when dysregulation  
116 was common to both pairs of strains. Therefore, seventy-seven *S. aureus* genes were specifically  
117 dysregulated in the context of competition and 140 genes in the context of coexistence while only  
118 16 genes were dysregulated both in competition and in co-existence (Table S4).

119  
120 KEGG analyses were performed on dysregulated genes to associate each gene with a functional  
121 class (fig. 2). In competition state, the main dysregulated class of genes belongs to genetic  
122 information and processing, with an increase of tRNA and ribosomal RNA (fig. 2A). We also  
123 observed the dysregulation of genes involved in major metabolism pathways of carbohydrates  
124 and amino acids. The down-regulation of the Acetyl-coenzyme A synthetase encoding gene  
125 (*acsA*) was noted. Other genes involved in energetic metabolism were up-regulated in the  
126 presence of *P. aeruginosa*, especially dehydrogenase enzymes such as the lactate dehydrogenase  
127 (*ldhA*), the alanine dehydrogenase (*aldI*), the glutamate dehydrogenase (*gluD*), the 1-pyrroline-5-  
128 carboxylate dehydrogenase (*rocA*), the 2-oxoglutarate dehydrogenase (*odhA*) and the aldehyde-  
129 alcohol dehydrogenase (*adhE*). The upregulation of the *ldh* gene is consistent with the up  
130 regulation of the L-lactate permease (*lctP*) encoding gene. All these factors, as well as acetyl-  
131 coA, are involved in energetic metabolism and redox reactions conducted to feed the Krebs cycle  
132 and ensure the production of ATP.

133  
134 In the context of coexistence, although *P. aeruginosa* does not appear to impact major metabolic  
135 pathways of *S. aureus* as it does not alter growth, the expression of 140 *S. aureus* genes was  
136 affected by the presence of *P. aeruginosa* (fig. 2B). Nine known and predicted virulence factor  
137 encoding genes were upregulated, including alpha-hemolysin (*hla*), staphylokinase (*sak*),  
138 aureolysin (*aur*), the immunoglobulin-binding protein (*sbi*) and staphylococcal complement  
139 inhibitor (*scn*) genes. We also observed the overexpression of *saeRS* genes, coding a two  
140 component system that has been described as playing a major role in controlling the production  
141 of virulence factors such as those mentioned above <sup>22</sup>.

142

143 Other genes whose expression were affected by the presence of *P. aeruginosa* in a coexistence  
144 situation are involved in carbohydrate, lipid, nucleotide and amino acid metabolism. Most of  
145 them were down-regulated as were several genes (*pgi*, *fbp*, *fda*) involved in glycolysis and the  
146 pentose phosphate pathway. Moreover, two operons (*nrdE*, *nrdI*, *nrdF* and *nrdG*, *nrdD*)  
147 belonging to ribonucleotide reductase (RNR) systems and converting nucleoside phosphate into  
148 deoxynucleotide phosphate, were both down-regulated (Table S4). RNRs are involved in the *de*  
149 *novo* production of deoxyribonucleotide di- or triphosphates, an essential process for the  
150 biosynthesis of DNA and its repair. They catalyze the limiting step of the synthesis of  
151 deoxyribonucleotide phosphates and thus control cell concentration <sup>23</sup>.

152  
153 Finally, several genes belonging to a transporter family were also over-expressed (polyamines,  
154 methionine, iron uptake and antibiotic resistance) in the coexistence state. Notably, all genes  
155 from the polyamine operon were over-expressed (*potABCD*) including *potR*, the regulator of  
156 polyamine genes. Polyamines control the physiology of *S. aureus* by acting as regulators of  
157 several genes involved in metabolism, transport and virulence <sup>24,25</sup>. In addition, the same pattern  
158 was observed for the *metQPN* operon involved in methionine transport and *sirA/B* and *sstA/BC*  
159 genes for iron uptake, which may also reflect nutrient competition in coculture. Finally,  
160 transporter *norb\_3* predicted as belonging to the *nor* family was over-expressed. Pumps from this  
161 family export a wide range of antibiotics such as erythromycin, tetracycline and quinolones.  
162 Indeed, *norb\_3* corresponds to the well-described *tet38* gene involved in tetracycline resistance  
163 and internalization in pulmonary epithelial cells <sup>26,27</sup>.

164  
165 To confirm these results, we performed co-cultivations with 12 different co-existence *P.*  
166 *aeruginosa-S. aureus* strain pairs from CF patients. The 12 strain pairs came from 12 different



167 patients and presented phenotypic diversity. *S. aureus* isolates belong to 8 different multilocus  
168 sequence typing (MLST) types (Table 1). Ten isolates of *P. aeruginosa* were mucoid and four  
169 secreted pigmentation, which was representative of the collection of all the isolates. Gene  
170 expression was assessed by RT-qPCR for the two categories most impacted: virulence factors and  
171 transporters (fig. 3). Regarding virulence factors, we confirmed the over-expression of the  
172 aureolysin encoding gene in 6 of the 7 strains that expressed the gene. For *sbi*, 5 out of 12 strains  
173 presented over-expression and 5 out 12 presented decreased expression, meaning that there was  
174 no clear profile of *P. aeruginosa*'s impact on this gene expression. For the other virulence genes  
175 tested, we observed reduced expression in the majority of the strains (10/12 for *hla*, 5/7 for *sak*,  
176 7/12 for *saeRS* and 8/12 for *scn*) (fig. 3).

177 For transporter encoding genes, we confirmed the over-expression of *pot* genes and the *sstA* gene  
178 in 6/12 and 7/10 strains, respectively. Noticeably, we confirmed the up-regulation of *tet38* genes  
179 in 11/12 strains with a fold change ranging from 3 to 200. In addition, *deoD* gene upregulation  
180 was also confirmed in 9/12 strains, consistent with its operon structure with *tet38* gene<sup>26</sup>.

181  
182 The over-expression of the *tet38* gene is the most predominant transcriptomic alteration in our  
183 study and may be of great importance as it can affect the antibiotic susceptibility of *S. aureus*, an  
184 important element in the context of CF disease. Therefore, we aimed to better characterize this  
185 transcriptomic alteration.

186  
187 **Over-expression of the *tet38* gene is due to the dysregulation of the MgrA regulatory**  
188 **pathway that impacts other *nor* family genes**

189 To decipher the molecular pathway involved in the over-expression of the *tet38* gene, we  
190 analyzed the expression of known regulators in the presence or absence of *P. aeruginosa*. Three

191 transcriptional negative regulators of *tet38* have already been described: TetR21<sup>26</sup>, SarZ<sup>28</sup> and  
192 MgrA<sup>27</sup>. The expression of these regulators was quantified by RT-qPCR in coculture and  
193 compared to expression in monoculture. None of the *tetR21*, *sarZ* and *mgrA* RNA levels was  
194 affected by the presence of *P. aeruginosa* (fig. S3).

195 However, it has been described that regulation by MgrA is dependent on its phosphorylation state  
196<sup>29</sup> and that the deletion of *mgrA* induces increased expression of *tet38*<sup>27</sup>. Therefore, we analyzed  
197 the impact of *P. aeruginosa* on *tet38* expression using a Newman  $\Delta mgrA$  mutant (fig. 4). The  
198 wild type Newman strain presented a 20-fold change over-expression of the *tet38* gene in the  
199 presence of *P. aeruginosa*, as we previously observed in clinical strains. This fold change was  
200 reduced to 6 for the  $\Delta mgrA$  mutant. Therefore, it appears that the over-expression of the *tet38*  
201 gene is induced by an alteration of the MgrA regulatory pathway. These results were confirmed  
202 in *S. aureus* Lac isogenic strains (fig. S4).

203 MgrA is also a transcriptional regulator of other *nor* family protein genes such as *norA*, *norB* and  
204 *norC*<sup>27,29,30</sup>. Hence, the expression of *nor* genes in *S. aureus* was monitored throughout  
205 cocultures of the 12 *S. aureus* strains with *P. aeruginosa* (fig. 5). The *Tet38* gene was  
206 significantly overexpressed in the presence of *P. aeruginosa* throughout the 8 hours of the  
207 culture. The *NorA* gene was over-expressed in at least 50% of cocultures (6/12 and 7/12) after 4  
208 and 6 hours of culture and *norC* expression was increased at 4 and 8 hours in 6/11 and 7/11  
209 strains, respectively (fig. 5). *norB* was overexpressed only at 8 hours of culture in 50% of the  
210 strains tested.

211 From the analysis of expression in the  $\Delta mgrA$  mutant in the *S. aureus* Newman strain, we  
212 concluded that over-expression of *norC* was dependent on MgrA integrity (fig. 4). A milder  
213 effect was observed on *norA* over-expression. No overexpression of *norB* gene was observed

214 with the *S. aureus* Newman strain. In the *S. aureus* Lac strain, we observed a diminution of *norA*  
215 and *norC* overexpression in the  $\Delta mgrA$  mutant but the effect was less significant than on *tet38*  
216 gene expression (fig. S4). Therefore, we concluded that the overexpression of *norA* and *norC*  
217 genes in the presence of *P. aeruginosa* was partially due to *mgrA* dysregulation.

218

### 219 **The presence of *P. aeruginosa* induces over-expression of *nor* genes by specific and direct** 220 **interaction**

221 To determine if a secreted product of *P. aeruginosa* induced the over-expression of *nor* genes, a  
222 transwell experiment was conducted in which cultures of *P. aeruginosa* and *S. aureus* were  
223 separated by a 0.4 $\mu$ m filter. In these conditions, *nor* genes were not overexpressed (fig. 6). The  
224 same results were obtained when *S. aureus* culture was exposed to supernatant of *P. aeruginosa*  
225 (fig. S3), suggesting that at least a close interaction between the two species was necessary.  
226 Finally, to determine if the over-expression was specific to the interaction of *P. aeruginosa*,  
227 cocultures were conducted with other bacteria frequently associated with *P. aeruginosa* in CF  
228 patients, such as *Burkholderia cepacia* and *Stenotrophomonas maltophilia* (fig. 7). No over-  
229 expression was observed, suggesting that the effect was specific to the presence of *P. aeruginosa*.  
230 These results were confirmed with other clinical *S. aureus* strains (fig. S6).

231

### 232 **Over-expression of *nor* genes induces an increase of antibiotic resistance and internalization** 233 **of *S. aureus* into epithelial cells**

234 As Tet38 is involved in tetracyclin resistance<sup>27</sup> and NorA and NorC are also implicated in  
235 quinolones (such as ciprofloxacin) uptake,<sup>30,31</sup> the impact of coculture with *P. aeruginosa* on *S.*  
236 *aureus* antibiotic susceptibility was tested. Firstly, the MIC was determined for each of the 12 *S.*

237 *aureus* strains used (Table S3). Monocultures and cocultures were then exposed to tetracycline  
238 and ciprofloxacin at MIC or 2xMIC. After plating on selective agar and numeration, the survival  
239 rate was determined by dividing the number of *S. aureus* after antibiotic treatment by the number  
240 of *S. aureus* without antibiotic treatment. A 3-fold increase in survival rate was observed at MIC  
241 and 2xMIC concentration in the presence of *P. aeruginosa* (fig. 8A and B).

242  
243 In order to demonstrate that the over-expression of the *tet38* gene was responsible for tetracycline  
244 resistance, the impact of *P. aeruginosa* was tested on the RN6390 wild type strain and its  
245 isogenic  $\Delta tet38$  mutant upon exposure to tetracycline. As expected, *P. aeruginosa* induced a  
246 higher survival rate of the RN6390 wild type strain after tetracycline exposure. On the contrary, it  
247 had no impact on the bacterial survival of the  $\Delta tet38$  mutant after tetracycline exposure (fig. 8C),  
248 confirming the role of the *tet38* gene in the enhancement of tetracycline resistance in the presence  
249 of *P. aeruginosa*.

250 Tet38 has also been described as being involved in pulmonary epithelial cell internalization<sup>26</sup>, so  
251 the impact of the presence of *P. aeruginosa* on *S. aureus* cell internalization was tested using the  
252 Gentamicin protection assay. When A549 epithelial cells were infected with a monoculture of *S.*  
253 *aureus*, no difference was observed in terms of bacterial adhesion onto A549 cells. Five percent  
254 of adherent bacteria were internalized into cells. When *S. aureus* was co-cultivated with *P.*  
255 *aeruginosa* before cell infection, 15% of *S. aureus* were internalized, meaning a 3-fold increase  
256 of the *S. aureus* internalization rate in the presence of *P. aeruginosa* (fig. 9). To ensure that the  
257 effect we observed was not due to an alteration of the A549 cell layer by *P. aeruginosa* that could  
258 have facilitated *S. aureus* internalization, we performed an LDH measurement on the cell  
259 supernatant as an indicator of A549 cell viability (fig. S7B). Although the LDH level was slightly

260 higher for cells infected only with *P. aeruginosa*, we found no significant difference between the  
261 *S. aureus* infected and *S. aureus* plus *P. aeruginosa* co-infected cells. Indeed, the A549 co-  
262 infected cells had the lowest level of LDH. Moreover, microscopic observation of the cells  
263 revealed no difference between the mono- and co-infected cells (fig. S7A). Therefore, it appeared  
264 that the presence of *P. aeruginosa* did not alter the A549 cells and the highest rate of *S. aureus*  
265 internalization was due to its direct impact on *S. aureus*. However, we could not be sure that the  
266 increase in the internalization rate was directly related to *tet38* overexpression. It could be the  
267 result of a modification of different factors involved in the internalization process, although we  
268 did not identify such factors in our transcriptomic analysis apart from the *tet38* gene.  
269

270 **DISCUSSION**

271

272 The goal of this study was to investigate the impact of the interaction of coexisting *S. aureus* and

273 *P. aeruginosa* on *S. aureus* at the transcriptional and phenotypical levels.

274 Firstly, we collected isolates from co-colonized CF patients and demonstrated that in 61% of

275 cases, *S. aureus* was able to coexist with *P. aeruginosa* with no alteration of its growth. So far, it

276 appears that coexistence of the two pathogens may be a frequent situation in the context of CF

277 patients' lung infection. Previous studies described that early infectious strains of *P. aeruginosa*

278 are more aggressive for *S. aureus* than the late infectious strains<sup>19,20</sup>. In the present study, we did

279 not find any correlation between the interaction type and the duration of *S. aureus* and *P.*

280 *aeruginosa* co-colonization. In the first studies, limited numbers of patients were studied (1 in

281 Michelsen et al., 2014 and 8 in Baldan et al., 2014). Even in our present study, only 11 patients

282 had competitive strain pairs, which might be not be enough to reach a conclusion. Up to now, it

283 has been difficult to conclude whether the interaction type between the two species is linked to

284 the evolution of the *P. aeruginosa* strain over the time of co-colonization. A larger cohort of

285 patients would be needed to answer this question. Also, longitudinal clinical studies would be

286 appropriate to analyze the kinetics of interaction evolution over time and determine how it could

287 affect patients' health. Furthermore, the conditions and environmental factors leading to co-

288 existence instead of competition require clarification, particularly through studies such one

289 conducted recently that demonstrated the positive impact of hypoxia found in static mucus within

290 CF airways on a coexisting interaction<sup>32</sup>.

291 The type of interaction may have an impact on the physiology of the two pathogens involved. In

292 order to answer this question, we conducted a transcriptional study of the impact of *P. aeruginosa*

293 on *S. aureus*.

294 In the context where *P. aeruginosa* inhibits *S. aureus* growth, transcriptomic modifications affect  
295 major metabolism pathways such as translation, Krebs cycle and genes involved in oxidative  
296 stress. The increase in the amount of tRNAs and ribosomal RNAs observed could be attributed to  
297 a decrease in translation efficiency. Regarding energetic metabolic pathways, we observed a  
298 down-expression of Acetyl-coA synthetase, a key factor metabolized into pyruvate to feed the  
299 Krebs cycle and produce energy. The down-regulation of expression observed may certainly lead  
300 to a defect in ATP production. Conversely, we observed the increased expression of several  
301 dehydrogenase enzymes, suggesting a shift from aerobic respiration to lactic acid fermentation to  
302 feed the Krebs cycle, as shown previously in laboratory strains<sup>33,34</sup>. Certain dehydrogenases,  
303 such as *adhE* and *gluD* genes, are also implicated in oxidative stress responses<sup>35</sup>. All these major  
304 dysregulations observed are consistent with the lethal effect of *P. aeruginosa* on *S. aureus* in  
305 competitive interaction.

306  
307 More genes were dysregulated when *S. aureus* and *P. aeruginosa* were coexisting. We observed a  
308 drastic modification in the nucleotide synthesis pathway with a down-regulation of genes  
309 involved in the *de novo* pathway (*nrd* operon) and upregulation of the *deoD* gene encoding a  
310 purine nucleoside phosphorylase involved in an alternative metabolic pathway for nucleotides  
311 when the *de novo* pathway is altered. We also observed a down-expression of genes involved in  
312 the classical energetic metabolism pathways: glycolysis and pentose phosphate pathways (*pgi*,  
313 *fbp*, *fda*). These results suggest nutritional competition between the two pathogens and indicate  
314 that in our conditions, *S. aureus* preferentially produced energy and nucleotides from sources  
315 other than glucose.

316 Finally, we observed the increased expression of several transporters, especially *tet38*, *norA* and  
317 *norC* genes. Curiously, the *tet38* gene belongs to the same transcription unit as the *deoD* gene. It

318 is tempting to speculate that the overexpression of *tet38-deoD* operon may be linked to the down  
319 regulation of the *nrd* genes to compensate for the alteration of the *de novo* nucleotide synthesis  
320 pathway.

321 These genes are members of the Nor family and encode efflux pumps involved in antibiotic  
322 resistance. *Tet38* was the most impacted gene with 11 pairs of 12 for which we observed an  
323 increased expression throughout the coculture kinetics, whereas the over-expression of other  
324 *norA* and *norC* genes appeared on 7 pairs of 12 and 11 of 12 at 6 and 8 hours, respectively. Given  
325 that the pair 2599/2600 used for the RNA sequencing (RNAseq) was unable to upregulate *norA*  
326 and *norC* at 4 hours of coculture, it was expected that *norA* and *norC* genes would not appear in  
327 the RNAseq results. The over-expression of *tet38*, *norA* and *norC* genes appeared to be at least  
328 due to a dysregulation of the MgrA pathway. Indeed, the  $\Delta mgrA$  mutant provoked a strong effect  
329 on *tet38* over-expression but only a slight effect on *norA* and *norC*. Thus, *mgrA* seems to be  
330 essential for *tet38* over-expression and other regulators must be implicated for the *norA* and *norC*  
331 genes. In addition, we were unable to observe clear *norB* up-regulation in the presence of *P.*  
332 *aeruginosa*. Indeed, MgrA act as a repressor of *tet38*, *norA* and *norC* and an activator of *norB* in  
333 an *rsbU* positive background strain<sup>36,37</sup>. This discrepancy may explain our results. Despite its  
334 role in *tet38* induction during coculture, *mgrA* expression was not affected by the presence of *P.*  
335 *aeruginosa*. However, it has been shown that the phosphorylation state of MgrA, regulated by  
336 RsbU and PknB factors, was a key mechanism for regulation of *nor* family gene expression<sup>29</sup>.  
337 Thus, *P. aeruginosa* may induce a variation of MgrA phosphorylation leading to a modification  
338 of *nor* gene expression.

339 *Nor* proteins are responsible for antibiotic efflux (tetracycline and fluoroquinolone), and we  
340 demonstrated that *P. aeruginosa* increased the survival rate of *S. aureus* after exposure to



341 tetracycline and ciprofloxacin. For tetracycline, the effect appears to be mainly due to *tet38*, as  
342 antibiotic resistance in presence of *P. aeruginosa* was eliminated in a *tet38* mutant. The same  
343 analysis could not be performed for *nor* genes due to the functional redundancy of the *norA*, *norB*  
344 and *norC* genes and the difficulty in obtaining triple mutants. Tet38 is also able to interact with  
345 the CD36 receptor on pulmonary epithelial cells to favor *S. aureus* internalization<sup>38</sup>. Indeed, in  
346 the presence of *P. aeruginosa*, we observed a higher rate of *S. aureus* internalization into  
347 epithelial cells. Internalized bacteria are more resistant to antibiotics and less detectable by the  
348 immune system<sup>39</sup>. Our results suggest that by coexisting with *P. aeruginosa*, *S. aureus* could  
349 hide from the host immune system and be more resistant to antibiotics.

350  
351 We did not identify the *P. aeruginosa* specific signal responsible for *S. aureus* gene expression  
352 dysregulation. However, we demonstrated that it seems to be specific to *P. aeruginosa* (no other  
353 species tested had the same effect) and requires very close proximity between *S. aureus* and *P.*  
354 *aeruginosa* to be effective. Transcriptomic analysis revealed that the *S. aureus* *potRABCD* operon  
355 for polyamine uptake and regulation exhibited significant fold change upon exposure to *P.*  
356 *aeruginosa*. The same effects were observed by Yoa and Lu<sup>25</sup> when exposing *S. aureus* to  
357 polyamines. Moreover, the exposure of *S. aureus* to spermine induces transcriptional  
358 modifications including over-expression of antibiotic efflux pumps such as *norA* and *tetM* genes  
359 and the decreased expression of many genes involved in carbohydrate metabolism and transport  
360<sup>24</sup>. These results are consistent with the reduced expression of genes involved in glycolysis and  
361 the pentose phosphate cycle described previously<sup>24,25</sup>. Indeed, we observed the same profile after  
362 exposure to *P. aeruginosa* as other authors observed after exposure to spermine. Finally, *P.*  
363 *aeruginosa* presents polyamines at the outer surface of its membrane, more precisely putrescine  
364 and spermidine<sup>40</sup>. Therefore, we suggest that the *P. aeruginosa* polyamines present at the outer

365 surface may be a signal for *S. aureus* transcriptional modifications. Further investigation will be  
366 necessary to confirm this hypothesis.

367 To the best of our knowledge, this study is the first to characterize the transcriptomic profile of  
368 coexisting *S. aureus* and *P. aeruginosa* pairs in a clinical context. We demonstrate that this  
369 commensal-like interaction induces phenotypical changes in *S. aureus* such as increased  
370 antibiotic resistance and host cell internalization. These phenotypes may favor the persistence of  
371 *S. aureus* in the context of chronic infection. Since this state of coexistence is apparently solely  
372 attributable to *P. aeruginosa*, the selective advantage for *P. aeruginosa* leads to questions.  
373 Indeed, previous studies showed that cocultivation with *S. aureus* induces LPS mutation in *P.*  
374 *aeruginosa* associated with fitness gain and antibiotic resistance <sup>41</sup>, and that *S. aureus*  
375 exoproducts restore and enhance *P. aeruginosa* motility <sup>32</sup>. The state of coexistence could thus  
376 represent a trade-off allowing both pathogens to benefit mutually and maintain equilibrium.  
377 However, the impact of *S. aureus* on *P. aeruginosa* in this state of coexistence warrants further  
378 investigation.

379

## 380 **MATERIALS AND METHODS**

381

### 382 **Bacterial strains and culture growth**

383 The bacterial strains and plasmids used in this study are listed in Tables 1 and S1. The clinical  
384 strains were originally isolated by the Institute for Infectious Agents from sputum samples of  
385 patients followed-up in the two CF Centers of Lyon (Hospices civils de Lyon, France). The  
386 strains were collected between May 2016 and June 2017 from 36 different patients. The size of  
387 the colonies, pigmentation and mucoid phenotype were determined after 24h of culture on TSA.

388 Hemolysis type was determined after 24h of culture on Columbia agar (COS). MLST clonal  
389 complex assignment was inferred from microarray analysis <sup>42</sup>.

390  
391 The  $\Delta tet38$  mutant of *S. aureus* RN6390 strain was obtained using the pMAD vector <sup>43</sup>. The two  
392 DNA fragments corresponding to the chromosomal regions upstream and downstream of the  
393 *tet38* coding sequence were amplified by PCR using primers listed in Table S2. They were  
394 subsequently cloned into the pMAD vector using the In-Fusion® HD Cloning Kit (Clontech).  
395 The resulting plasmid was electroporated into the RN4220 recipient strain and then transferred to  
396 RN6390. Growth at non-permissive temperature (44°C) was followed by several subcultures at  
397 30°C and 37°C to promote double crossing over as previously described <sup>44</sup>.

398  
399 All the strains were grown in Brain Heart Infusion (BHI, BBL™ Difco) with shaking at 200 rpm  
400 at 37°C overnight. Cultures were diluted to 0.1 OD<sub>600nm</sub> and incubated for 2.5 hours (37°C,  
401 200rpm). Bacteria were spun down at 4000 rpm for 10 min and re-suspended in fresh BHI  
402 medium to 2 OD<sub>600nm</sub>. Ten ml of *S. aureus*, *P. aeruginosa*, *B. cenocepacia* and *S. maltophilia*  
403 suspension were added to 10 ml of BHI for monocultures. Ten ml of *S. aureus* suspension was  
404 mixed with respectively 10 ml of *P. aeruginosa*, *B. cenocepacia* or *S. maltophilia* for cocultures.  
405 Cultures were grown for 8h. Every two hours, cultures were plated on mannitol salt agar (MSA,  
406 BBL™ Difco) and ceftrimide (Difco™) for *S. aureus* or *P. aeruginosa* counts, respectively.

407 For supernatant exposure, 10 mL of *S. aureus* culture was added to 10 ml of supernatant from 8  
408 hours culture of *P. aeruginosa*.

409 Transwell® (Corning) preliminary experiment demonstrated that bacteria were not able to cross  
410 the 0.4 µm filter of the insert. *S. aureus* and *P. aeruginosa* suspensions from 2.5 h culture were

411 pelleted and re-suspended to  $OD_{600nm} = 1$  for *P. aeruginosa* and  $OD_{600nm} = 0.33-0.5$  for *S. aureus*.  
412 The Transwell<sup>®</sup> experiment was carried out as previously described<sup>45,46</sup> with a few  
413 modifications. For wells without insert, 400  $\mu$ L of *S. aureus*  $OD_{600nm} = 0.5$  suspension and 200 $\mu$ L  
414 of either BHI or *P. aeruginosa* were added. For wells with insert, 600  $\mu$ L of *S. aureus* 0.33  
415  $OD_{600nm}$  was deposited into the wells while 200  $\mu$ L of either BHI or *P. aeruginosa* was placed onto  
416 the insert. The Transwell<sup>®</sup> system was incubated at 37°C for 8 hours.

417

### 418 ***Staphylococcus aureus* growth inhibition on TSA**

419 From overnight cultures, *S. aureus* and *P. aeruginosa* suspensions were diluted to  $OD_{600} = 0.5$   
420 and 100  $\mu$ l of *S. aureus* suspension was spread uniformly onto TSA plates. Then, 5  $\mu$ l of *P.*  
421 *aeruginosa* was added at the center of the plates. The plates were incubated at 37°C. The  
422 competitive phenotype was characterized by an inhibition halo of *S. aureus* growth, which was  
423 measured. The strains were considered as coexisting in the absence of inhibition halo.

424

### 425 **Genome sequencing and annotation**

426 Sequencing libraries were prepared from 1 ng of SA2597 and SA2599 DNA extracted using the  
427 DNA Isolation Kit (MO BIO). Library preparation was performed with the Nextera XT DNA  
428 sample preparation kit (Illumina) and index kit (Illumina). Library validation was performed on a  
429 2100 Bioanalyzer (Agilent Technologies) to control the distribution of fragmented DNA. WGS  
430 was performed with an Illumina HiSeq (Illumina) to generate 150-bp paired end reads. Genomes  
431 were sequenced with an average coverage of 130x. Adapters and other illumina-specific  
432 sequences were cut from the reads for each set of raw data. Furthermore, Trimmomatic v0.36  
433<sup>47</sup> was used to perform an additional trimming step using a sliding window with an average  
434 quality threshold of 20. Data were checked for quality by FastQC v0.11.6 (S. Andrews,

435 2010. FastQC: a quality control tool for high throughput sequence data; available online at:  
436 <http://www.bioinformatics.babraham.ac.uk/projects/fastqc>). Assemblies were performed using  
437 SPAdes v3.11.1<sup>48</sup>. Contigs smaller than 200 bp or with a coverage threshold smaller than 2 were  
438 removed manually. Assembly quality control was performed using Quast v4.6.1<sup>49</sup>. Genome  
439 annotation was processed through Prokka v1.13 including ncRNA prediction<sup>50</sup>.  
440 To compare CDS and ncRNA from SA2597 and SA2599, the N315 strain (NC\_002745.2) was  
441 used as a reference. Refseq numbers were gathered from N315 and used as ID tags for common  
442 genes. For non-common genes, CDS and ncRNA from SA2597 and SA2599 were blasted with  
443 each other with a coverage and identity of 90%. Finally, refseq numbers were also used to gather  
444 KEGG numbers and perform functional classification with the Kyoto database. The complete  
445 genome sequences for the SA2597 and SA2599 strains were deposited in GenBank under the  
446 accession numbers GCA\_005280135.1 and GCA\_005280145.1.

447

#### 448 **Transcriptomic analysis**

449 Cultures and transcriptome sequencing were performed in duplicates or triplicates. The OD<sub>600</sub> of  
450 each culture was normalized to 1.0 at a time of 4 hours for the mono and cocultures. One mL was  
451 centrifuged for 5 minutes at 13,000 rpm. Bacteria were treated with lysostaphin (2.5 mg/mL) and  
452 lysozyme (50 mg/mL) prior to RNA extraction using the RNeasy Plus Mini Kit (Qiagen). RNAs  
453 were treated with TURBO DNA-free™ (Invitrogen). rRNAs were depleted using the Ribo-Zero  
454 rRNA Removal Kit (Illumina). The cDNA libraries were compiled using the TruSeq Stranded  
455 Total RNA Library Preparation Kit (Illumina). The quantification and quality of the DNA  
456 libraries was evaluated by Bioanalyzer. The libraries were sequenced using Illumina Hi-Seq 2500  
457 with High-Output (HO) mode, using a V4 chemistry sequencing kit (Illumina). Reads were then  
458 processed to remove adapter sequences. Poor quality reads were excluded by Trimmomatic<sup>47</sup>,

459 using a sliding window with an average quality threshold of 20. Each RNAseq read sample was  
460 mapped against its own genome through Bowtie2 v2.3.0 with a sensitive local alignment method  
461 <sup>51</sup>. Output files were sorted by read names and converted into BAM format using Samtools  
462 v1.3.1. Reads were counted on all feature types (CDS, nc/tm/rRNA) using a union mode on  
463 Htseq-count v0.6.1 software <sup>52</sup>. To estimate the enrichment values for the differential expression  
464 analysis, statistical analysis was done using R v3.3.3 and DEseq2 v1.14.1 <sup>53</sup>. Gene expression  
465 was considered as dysregulated when: (i) the fold change between co-culture and monoculture  
466 was at least 4-fold, (ii) the dysregulation was observed in the two pairs of strains, (iii) the  
467 dysregulation was specific to coexistence or competition state. The RNAseq data that support our  
468 findings are available in the SRAdatabase under the BioprojectID PRJNA552713,  
469 PRJNA552715, PRJNA552786, PRJNA554237, PRJNA554233, PRJNA554237.

470

#### 471 **RT-qPCR**

472 RNA extractions were performed using the RNeasy Plus Mini Kit (Qiagen). A DNase treatment  
473 was performed on 10 µg of RNAs using TURBO DNA-free<sup>TM</sup> (Invitrogen). The absence of  
474 contaminating gDNA was controlled by PCR. cDNA was synthesized from 1µg RNA using the  
475 Reverse Transcription system kit (Promega). The qPCR reactions were performed with  
476 PowerUp<sup>TM</sup> SYBR<sup>TM</sup> Green Master Mix (Thermofisher) following the manufacturer's  
477 instructions. The target genes and primers used are listed in Table S2. The housekeeping genes  
478 *gyrB* and *hu* were used as endogenous control. Gene expression analyses were performed using  
479 the  $\Delta$ Ct method.

480

#### 481 **Antibiotic resistance assay**

482 MICs of tetracycline and ciprofloxacin (Sigma) were determined by BHI micro-dilution (Table  
483 S3). For the antibiotic resistance assay, 4 hour mono-cultures of *S. aureus* and cocultures of *S.*  
484 *aureus/P. aeruginosa* were diluted to  $OD_{600nm} = 0.002$  or  $0.004$ , respectively, and exposed to  
485 antibiotics at MIC and 2xMIC for 5 hours at 37°C at 200 rpm in 1mL of BHI. Cultures were  
486 plated on MSA agar plates for *S. aureus* counts. The percentage of bacterial survival after  
487 antibiotic treatment was determined by dividing the number of *S. aureus* after antibiotic treatment  
488 by the number of *S. aureus* without antibiotic treatment.

489

#### 490 **Internalization within A549 cells**

491 *S. aureus* monocultures and *S. aureus/P. aeruginosa* cocultures were performed for 4 hours as  
492 previously described<sup>54</sup>. A549 cells were grown in DMEM GlutaMAX™ medium (Gibco)  
493 supplemented with 10% of Fetal Bovine Serum (37°C, 5% CO<sub>2</sub>). 24-well tissue culture plates  
494 were seeded at 80 000 cells per well. After 24 hours, the cells were washed twice with 1 ml of  
495 Phosphate Buffered Saline (PBS, Gibco) and infected at a multiplicity of infection (MOI) of 10:1  
496 for mono-culture and 20:1 for coculture. Cells were incubated for 2 hours, then washed once in  
497 PBS to remove non-adherent bacteria and incubated for 1 hour in DMEM GlutaMAX™  
498 supplemented with 400 µg/mL gentamicin (Sigma), 100 µg/mL polymyxin B (Sigma) and 10  
499 µg/mL lysostaphin to kill extra-cellular bacteria. Cells were washed again with PBS once and  
500 lysed with deionized water. Cell lysates were plated on MSA to quantify the intracellular  
501 bacteria.

502

#### 503 **Data availability**

504 The datasets generated during and/or analyzed during the current study are available from the  
505 corresponding author on reasonable request.

506 The complete genome sequences for the SA2597 and SA2599 strains have been deposited in  
507 GenBank under the accession number GCA\_005280135.1 and GCA\_005280145.1.

508 The RNAseq data that support our findings are available in the SRAdatabase under the  
509 BioprojectID PRJNA552713, PRJNA552715, PRJNA552786, PRJNA554237, PRJNA554233,  
510 PRJNA554237.

511 **Ethical statement**

512 All the methods were carried out in accordance with relevant guidelines and regulations.



513 **References**

- 514 1. Armbruster, C. E. *et al.* Indirect Pathogenicity of Haemophilus influenzae and Moraxella  
515 catarrhalis in Polymicrobial Otitis Media Occurs via Interspecies Quorum Signaling.  
516 *mBio* **1**, e00102-10-e00102-19 (2010).
- 517 2. Korgaonkar, A., Trivedi, U., Rumbaugh, K. P. & Whiteley, M. Community surveillance  
518 enhances Pseudomonas aeruginosa virulence during polymicrobial infection. *Proc. Natl.*  
519 *Acad. Sci.* **110**, 1059–1064 (2013).
- 520 3. Sibley, C. D. *et al.* Discerning the Complexity of Community Interactions Using a  
521 Drosophila Model of Polymicrobial Infections. *PLoS Pathog.* **4**, e1000184 (2008).
- 522 4. Vega, N. M., Allison, K. R., Samuels, A. N., Klempner, M. S. & Collins, J. J. Salmonella  
523 typhimurium intercepts Escherichia coli signaling to enhance antibiotic tolerance. *Proc.*  
524 *Natl. Acad. Sci.* **110**, 14420–14425 (2013).
- 525 5. Zolin, Orenti, Naehrlich & van Rens. ECFS Patient Registry Annual Data Report 2017.  
526 (2019).
- 527 6. Hubert, D. *et al.* Association between Staphylococcus aureus alone or combined with  
528 Pseudomonas aeruginosa and the clinical condition of patients with cystic fibrosis. *J.*  
529 *Cyst. Fibros.* **12**, 497–503 (2013).
- 530 7. Wolter, D. J. *et al.* Staphylococcus aureus small-colony variants are independently  
531 associated with worse lung disease in children with cystic fibrosis. *Clin. Infect. Dis. Off.*  
532 *Publ. Infect. Dis. Soc. Am.* **57**, 384–391 (2013).
- 533 8. Hoffman, L. R. *et al.* Selection for Staphylococcus aureus small-colony variants due to  
534 growth in the presence of Pseudomonas aeruginosa. *Proc. Natl. Acad. Sci.* **103**, 19890–  
535 19895 (2006).

- 536 9. Maselli, J. H. *et al.* Risk factors for initial acquisition of *Pseudomonas aeruginosa* in  
537 children with cystic fibrosis identified by newborn screening. *Pediatr. Pulmonol.* **35**,  
538 257–262 (2003).
- 539 10. Junge, S. *et al.* Factors Associated with Worse Lung Function in Cystic Fibrosis Patients  
540 with Persistent *Staphylococcus aureus*. *PLOS ONE* **11**, e0166220 (2016).
- 541 11. Raidt, L. *et al.* Increased Prevalence and Resistance of Important Pathogens Recovered  
542 from Respiratory Specimens of Cystic Fibrosis Patients During a Decade. *Pediatr. Infect.*  
543 *Dis. J.* **34**, 700–705 (2015).
- 544 12. Hudson, V. L., Wielinski, C. L. & Regelman, W. E. Prognostic implications of initial  
545 oropharyngeal bacterial flora in patients with cystic fibrosis diagnosed before the age of  
546 two years. *J. Pediatr.* **122**, 854–860 (1993).
- 547 13. Sagel, S. D. *et al.* Impact of *Pseudomonas* and *Staphylococcus* Infection on Inflammation  
548 and Clinical Status in Young Children with Cystic Fibrosis. *J. Pediatr.* **154**, 183-188.e3  
549 (2009).
- 550 14. Wakeman, C. A. *et al.* The innate immune protein calprotectin promotes *Pseudomonas*  
551 *aeruginosa* and *Staphylococcus aureus* interaction. *Nat. Commun.* **7**, (2016).
- 552 15. Hogan, D. A. *et al.* Analysis of Lung Microbiota in Bronchoalveolar Lavage, Protected  
553 Brush and Sputum Samples from Subjects with Mild-To-Moderate Cystic Fibrosis Lung  
554 Disease. *PLOS ONE* **11**, e0149998 (2016).
- 555 16. Hotterbeekx, A., Kumar-Singh, S., Goossens, H. & Malhotra-Kumar, S. In vivo and In vitro  
556 Interactions between *Pseudomonas aeruginosa* and *Staphylococcus* spp. *Front. Cell.*  
557 *Infect. Microbiol.* **7**, (2017).

- 558 17. Mashburn, L. M., Jett, A. M., Akins, D. R. & Whiteley, M. Staphylococcus aureus Serves as  
559 an Iron Source for Pseudomonas aeruginosa during In Vivo Coculture. *J. Bacteriol.* **187**,  
560 554–566 (2005).
- 561 18. Pernet, E. *et al.* Pseudomonas aeruginosa eradicates Staphylococcus aureus by  
562 manipulating the host immunity. *Nat. Commun.* **5**, 5105 (2014).
- 563 19. Michelsen, C. F. *et al.* Staphylococcus aureus Alters Growth Activity, Autolysis, and  
564 Antibiotic Tolerance in a Human Host-Adapted Pseudomonas aeruginosa Lineage. *J.*  
565 *Bacteriol.* **196**, 3903–3911 (2014).
- 566 20. Baldan, R. *et al.* Adaptation of Pseudomonas aeruginosa in Cystic Fibrosis Airways  
567 Influences Virulence of Staphylococcus aureus In Vitro and Murine Models of Co-  
568 Infection. *PLoS ONE* **9**, e89614 (2014).
- 569 21. Limoli, D. H. *et al.* Pseudomonas aeruginosa Alginate Overproduction Promotes  
570 Coexistence with Staphylococcus aureus in a Model of Cystic Fibrosis Respiratory  
571 Infection. *mBio* **8**, e00186-17 (2017).
- 572 22. Liu, Q., Yeo, W.-S. & Bae, T. The SaeRS Two-  
573 Component System of Staphylococcus aureus. *Genes* **7**, (2016).
- 574 23. Nordlund, P. & Reichard, P. Ribonucleotide Reductases. **29** (2006).
- 575 24. Yao, X. & Lu, C.-D. Characterization of Staphylococcus aureus Responses to Spermine  
576 Stress. *Curr. Microbiol.* **69**, 394–403 (2014).
- 577 25. Yao, X. & Lu, C.-D. Functional Characterization of the potRABCD Operon for Spermine  
578 and Spermidine Uptake and Regulation in Staphylococcus aureus. *Curr. Microbiol.* **69**,  
579 75–81 (2014).

- 580 26. Truong-Bolduc, Q. C. *et al.* Role of the Tet38 Efflux Pump in *Staphylococcus aureus*  
581 Internalization and Survival in Epithelial Cells. *Infect. Immun.* **83**, 4362–4372 (2015).
- 582 27. Truong-Bolduc, Q. C., Dunman, P. M., Strahilevitz, J., Projan, S. J. & Hooper, D. C. MgrA Is a  
583 Multiple Regulator of Two New Efflux Pumps in *Staphylococcus aureus*. *J. Bacteriol.* **187**,  
584 2395–2405 (2005).
- 585 28. Chen, P. R. *et al.* A new oxidative sensing and regulation pathway mediated by the MgrA  
586 homologue SarZ in *Staphylococcus aureus*. *Mol. Microbiol.* **71**, 198–211 (2009).
- 587 29. Truong-Bolduc, Q. C. & Hooper, D. C. Phosphorylation of MgrA and its effect on  
588 expression of the NorA and NorB efflux pumps of *Staphylococcus aureus*. *J. Bacteriol.*  
589 **192**, 2525–2534 (2010).
- 590 30. Truong-Bolduc, Q. C., Strahilevitz, J. & Hooper, D. C. NorC, a New Efflux Pump Regulated  
591 by MgrA of *Staphylococcus aureus*. *Antimicrob. Agents Chemother.* **50**, 1104–1107  
592 (2006).
- 593 31. Fournier, B., Aras, R. & Hooper, D. C. Expression of the Multidrug Resistance Transporter  
594 NorA from *Staphylococcus aureus* Is Modified by a Two-Component Regulatory System.  
595 *J. Bacteriol.* **182**, 664–671 (2000).
- 596 32. Pallett, R. *et al.* Anaerobiosis influences virulence properties of *Pseudomonas*  
597 *aeruginosa* cystic fibrosis isolates and the interaction with *Staphylococcus aureus*. *Sci.*  
598 *Rep.* **9**, 6748 (2019).
- 599 33. Filkins, L. M. *et al.* Coculture of *Staphylococcus aureus* with *Pseudomonas aeruginosa*  
600 Drives *S. aureus* towards Fermentative Metabolism and Reduced Viability in a Cystic  
601 Fibrosis Model. *J. Bacteriol.* **197**, 2252–2264 (2015).

- 602 34. Tognon, M., Köhler, T., Luscher, A. & van Delden, C. Transcriptional profiling of  
603 *Pseudomonas aeruginosa* and *Staphylococcus aureus* during in vitro co-culture. *BMC*  
604 *Genomics* **20**, (2019).
- 605 35. Korem, M., Gov, Y. & Rosenberg, M. Global gene expression in *Staphylococcus aureus*  
606 following exposure to alcohol. *Microb. Pathog.* **48**, 74–84 (2010).
- 607 36. Truong-Bolduc, Q. C., Ding, Y. & Hooper, D. C. Posttranslational Modification Influences  
608 the Effects of MgrA on norA Expression in *Staphylococcus aureus*. *J. Bacteriol.* **190**,  
609 7375–7381 (2008).
- 610 37. Luong, T. T., Dunman, P. M., Murphy, E., Projan, S. J. & Lee, C. Y. Transcription Profiling of  
611 the mgrA Regulon in *Staphylococcus aureus*. *J. Bacteriol.* **188**, 1899–1910 (2006).
- 612 38. Truong-Bolduc, Q. C., Khan, N. S., Vyas, J. M. & Hooper, D. C. Tet38 Efflux Pump Affects  
613 *Staphylococcus aureus* Internalization by Epithelial Cells through Interaction with CD36  
614 and Contributes to Bacterial Escape from Acidic and Nonacidic Phagolysosomes. *Infect.*  
615 *Immun.* **85**, e00862-16 (2017).
- 616 39. Löffler, B., Tuchscher, L., Niemann, S. & Peters, G. *Staphylococcus aureus* persistence in  
617 non-professional phagocytes. *Int. J. Med. Microbiol.* **304**, 170–176 (2014).
- 618 40. Johnson, L., Mulcahy, H., Kanevets, U., Shi, Y. & Lewenza, S. Surface-Localized Spermidine  
619 Protects the *Pseudomonas aeruginosa* Outer Membrane from Antibiotic Treatment and  
620 Oxidative Stress. *J. Bacteriol.* **194**, 813–826 (2012).
- 621 41. Tognon, M. *et al.* Co-evolution with *Staphylococcus aureus* leads to lipopolysaccharide  
622 alterations in *Pseudomonas aeruginosa*. *ISME J.* (2017). doi:10.1038/ismej.2017.83

- 623 42. Tristan, A. *et al.* Rise of CC398 lineage of *Staphylococcus aureus* among Infective  
624 endocarditis isolates revealed by two consecutive population-based studies in France.  
625 *PloS One* **7**, e51172 (2012).
- 626 43. Arnaud, M., Chastanet, A. & Debarbouille, M. New Vector for Efficient Allelic  
627 Replacement in Naturally Nontransformable, Low-GC-Content, Gram-Positive Bacteria.  
628 *Appl. Environ. Microbiol.* **70**, 6887–6891 (2004).
- 629 44. Boisset, S. *et al.* *Staphylococcus aureus* RNAlII coordinately represses the synthesis of  
630 virulence factors and the transcription regulator Rot by an antisense mechanism. *Genes*  
631 *Dev.* **21**, 1353–1366 (2007).
- 632 45. Nguyen, A. T. *et al.* Cystic Fibrosis Isolates of *Pseudomonas aeruginosa* Retain Iron-  
633 Regulated Antimicrobial Activity against *Staphylococcus aureus* through the Action of  
634 Multiple Alkylquinolones. *Front. Microbiol.* **7**, (2016).
- 635 46. Nguyen, A. T., Jones, J. W., Ruge, M. A., Kane, M. A. & Oglesby-Sherrouse, A. G. Iron  
636 Depletion Enhances Production of Antimicrobials by *Pseudomonas aeruginosa*. *J.*  
637 *Bacteriol.* **197**, 2265–2275 (2015).
- 638 47. Bolger, A. M., Lohse, M. & Usadel, B. Trimmomatic: a flexible trimmer for Illumina  
639 sequence data. *Bioinforma. Oxf. Engl.* **30**, 2114–2120 (2014).
- 640 48. Bankevich, A. *et al.* SPAdes: a new genome assembly algorithm and its applications to  
641 single-cell sequencing. *J. Comput. Biol. J. Comput. Mol. Cell Biol.* **19**, 455–477 (2012).
- 642 49. Gurevich, A., Saveliev, V., Vyahhi, N. & Tesler, G. QUAST: quality assessment tool for  
643 genome assemblies. *Bioinforma. Oxf. Engl.* **29**, 1072–1075 (2013).
- 644 50. Seemann, T. Prokka: rapid prokaryotic genome annotation. *Bioinforma. Oxf. Engl.* **30**,  
645 2068–2069 (2014).

- 646 51. Langmead, B., Trapnell, C., Pop, M. & Salzberg, S. L. Ultrafast and memory-efficient  
647 alignment of short DNA sequences to the human genome. *Genome Biol.* **10**, R25 (2009).
- 648 52. Anders, S., Pyl, P. T. & Huber, W. HTSeq--a Python framework to work with high-  
649 throughput sequencing data. *Bioinforma. Oxf. Engl.* **31**, 166–169 (2015).
- 650 53. Varet, H., Brillet-Guéguen, L., Coppée, J.-Y. & Dillies, M.-A. SARTools: A DESeq2- and  
651 EdgeR-Based R Pipeline for Comprehensive Differential Analysis of RNA-Seq Data. *PLoS*  
652 *One* **11**, e0157022 (2016).
- 653 54. Trouillet, S. *et al.* A novel flow cytometry-based assay for the quantification of  
654 *Staphylococcus aureus* adhesion to and invasion of eukaryotic cells. *J. Microbiol.*  
655 *Methods* **86**, 145–149 (2011).
- 656 55. Novick, R. P. *et al.* Synthesis of staphylococcal virulence factors is controlled by a  
657 regulatory RNA molecule. *EMBO J.* **12**, 3967 (1993).
- 658 56. Duthie, E. S. & Lorenz, L. L. Staphylococcal coagulase; mode of action and antigenicity. *J.*  
659 *Gen. Microbiol.* **6**, 95–107 (1952).
- 660 57. Supersac, G., Piémont, Y., Kubina, M., Prévost, G. & Foster, T. J. Assessment of the role of  
661 gamma-toxin in experimental endophthalmitis using *ahlg*-deficient mutant  
662 of *Staphylococcus aureus*. *Microb. Pathog.* **24**, 241–251 (1998).
- 663 58. Wolz, C., McDevitt, D., Foster, T. J. & Cheung, A. L. Influence of *agr* on fibrinogen binding  
664 in *Staphylococcus aureus* Newman. *Infect. Immun.* **64**, 3142–3147 (1996).
- 665 59. Crosby, H. A. *et al.* The *Staphylococcus aureus* Global Regulator MgrA Modulates  
666 Clumping and Virulence by Controlling Surface Protein Expression. *PLoS Pathog.* **12**,  
667 (2016).

668 60. Voyich, J. M. *et al.* Is Panton-Valentine Leukocidin the Major Virulence Determinant in  
669 Community-Associated Methicillin-Resistant *Staphylococcus aureus* Disease? *J. Infect.*  
670 *Dis.* **194**, 1761–1770 (2006).

671 61. Rasigade, J.-P. *et al.* PSMs of Hypervirulent *Staphylococcus aureus* Act as Intracellular  
672 Toxins That Kill Infected Osteoblasts. *PLoS ONE* **8**, (2013).

673

#### 674 **Acknowledgements**

675 This work was supported by the Fondation pour la Recherche Médicale, grant number  
676 ECO20170637499 to LC; Finovi foundation to KM and FV. We thank Xavier Charpentier of  
677 CIRI, Lyon-France, for discussing the work and providing valuable advice.

#### 678 **Author contributions statements**

679 PB, LC, SB, FV and KM designed and analyzed the experiments. PB conducted the experiments.  
680 SB conducted and analyzed all bioinformatics works. ADJ collected the clinical samples from CF  
681 patients. KM and FV coordinated the project. PB and KM collected the data and wrote the first  
682 draft of the manuscript. All the authors contributed to manuscript revision and read and approved  
683 the submitted version.

#### 684 **Competing interests**

685 The authors declare no competing interests.

686



687 **Figures**

688  
689 A

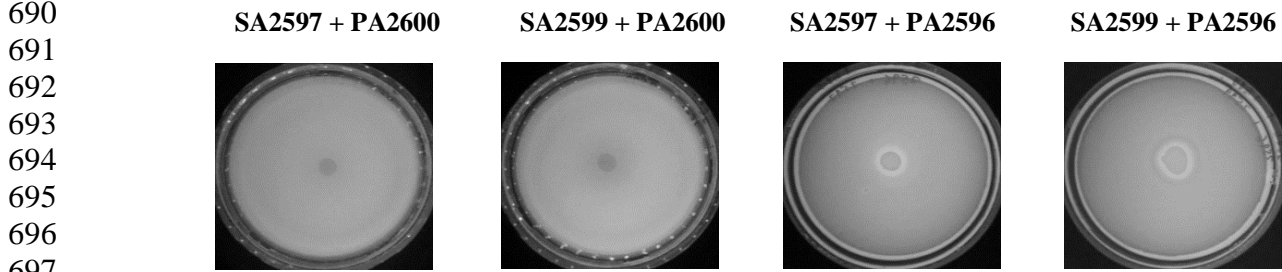

B

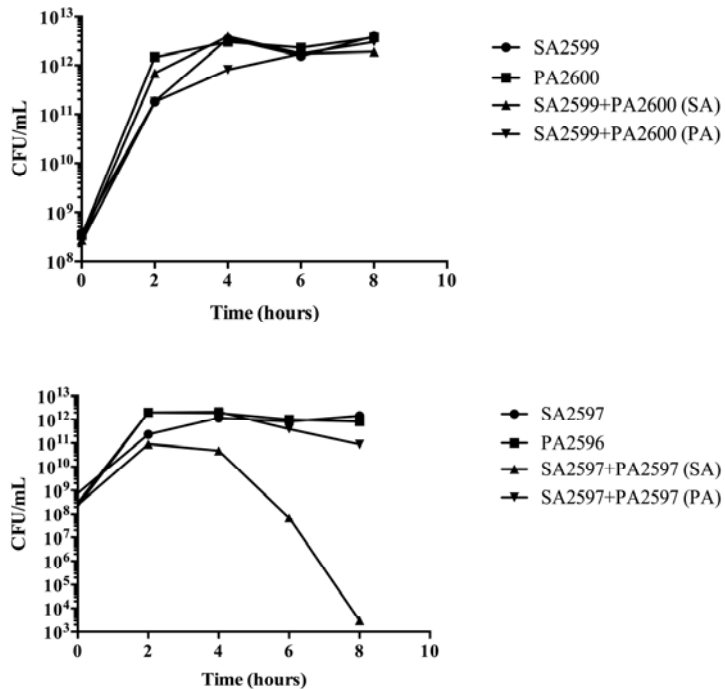

698  
699  
700  
701 **Figure 1:** Competition assay between *S. aureus* and *P. aeruginosa*. **A.** Competition test on agar  
702 plate. *S. aureus* and *P. aeruginosa* were grown on BHI for 8 hours at 37°C. A layer of *S. aureus*  
703 was added on a TSA. After drying, a drop of *P. aeruginosa* was spotted. The inhibition halo  
704 indicates a competition state (SA2597+PA2596 and SA2599+PA2596). **B.** Competition assay in  
705 planktonic culture. *S. aureus* and *P. aeruginosa* were mono-cultivated and co-cultivated for 8  
706 hours. Every two hours, bacteria were plated on mannitol salt agar (MSA) and cetrimide to count

707 *S. aureus* and *P. aeruginosa*, respectively. The results show one representative experiment from a  
708 triplicate. Upper panels, pairs in coexistence. Lower panels, pairs in competition.

709 A - Competition

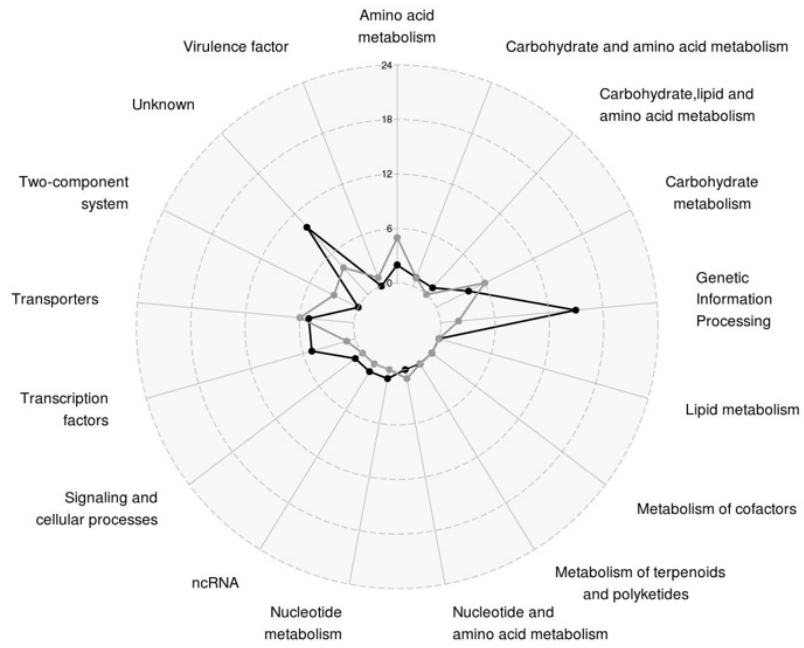

710

711 B - Coexistence

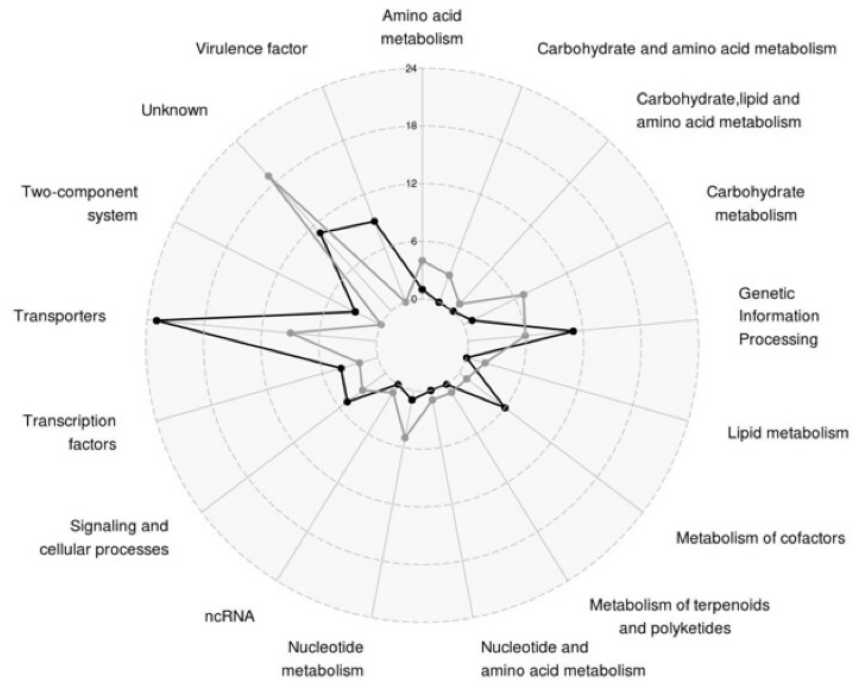

712

713

714 **Figure 2:** Number and functions of differentially expressed staphylococcal genes in the presence  
715 of *P. aeruginosa* when: **A.** both species are in competition (SA2596 and SA2599 were co-  
716 cultivated with PA2597) **B.** and in coexistence (SA2596 and SA2599 were co-cultivated with  
717 PA2600). RNAs were extracted at 4 hours and a RNAseq was performed in triplicates. KEGG  
718 mapper analysis was conducted on common significantly over-expressed (black) and under-  
719 expressed genes (grey) to address a functional classification. A gene was considered as  
720 differentially expressed when the fold change was strictly higher than 4 with  $P_{adj} < 0.05$ .

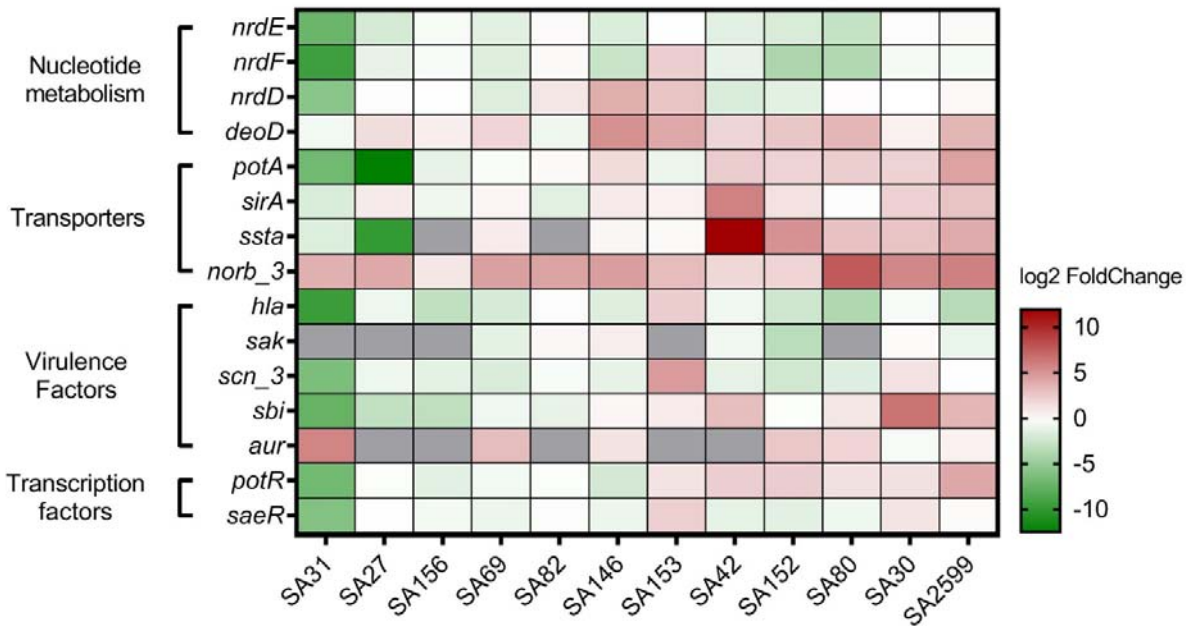

721

722

723 **Figure 3:** Confirmation of *S. aureus* gene expression dysregulation by *P. aeruginosa*. Twelve  
724 clinical SA-PA pairs of strains were co-cultivated for 4 hours. RNAs were extracted and RT-  
725 qPCR were performed on 15 genes. The results are represented as fold change of expression  
726 (gene relative expression in coculture/ gene relative expression in monoculture) on a heatmap.  
727 Under-expressed genes are indicated in green whereas over-expressed genes are indicated in red.  
728 No RNA detection is shown in gray. Pairs were hierarchically clustered by the Euclidean method.

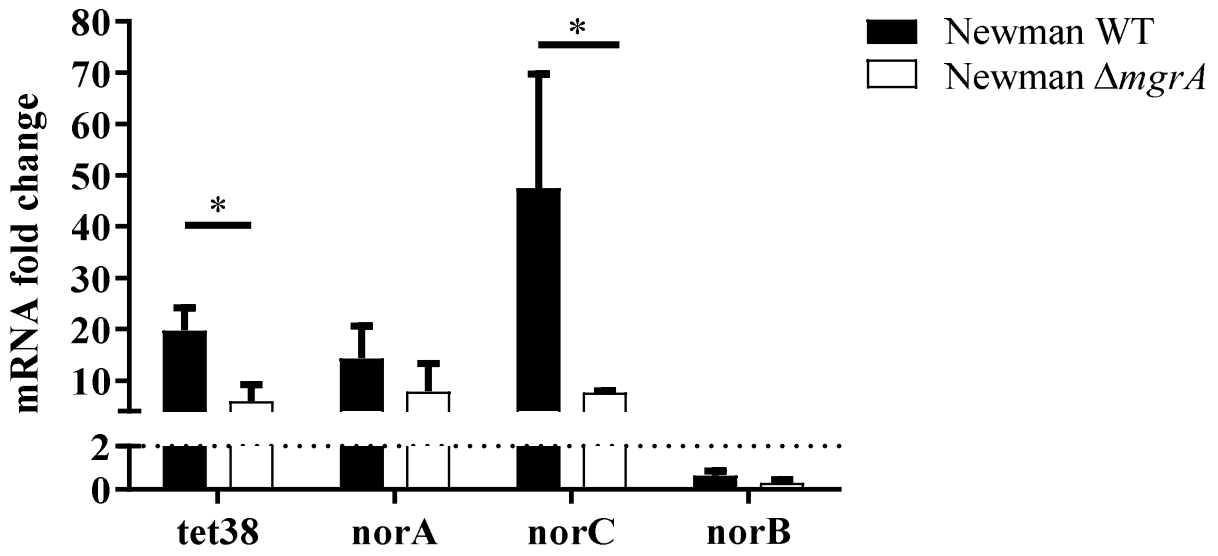

729  
730

731 **Figure 4:** The *S. aureus* MgrA regulator is important for *nor* gene over-expression. Cocultures  
732 with *S. aureus* Newman wild type (WT) and  $\Delta mgrA$  mutants and PA30 were performed. RNAs  
733 were extracted at 8 hours and *nor* gene expression was monitored by RT-qPCR. The results are  
734 shown as the mean + standard deviation of three independent experiments. Dotted lines indicate  
735 fold change= 2. Statistical analysis was performed by unpaired t-test (\* P<0.05).

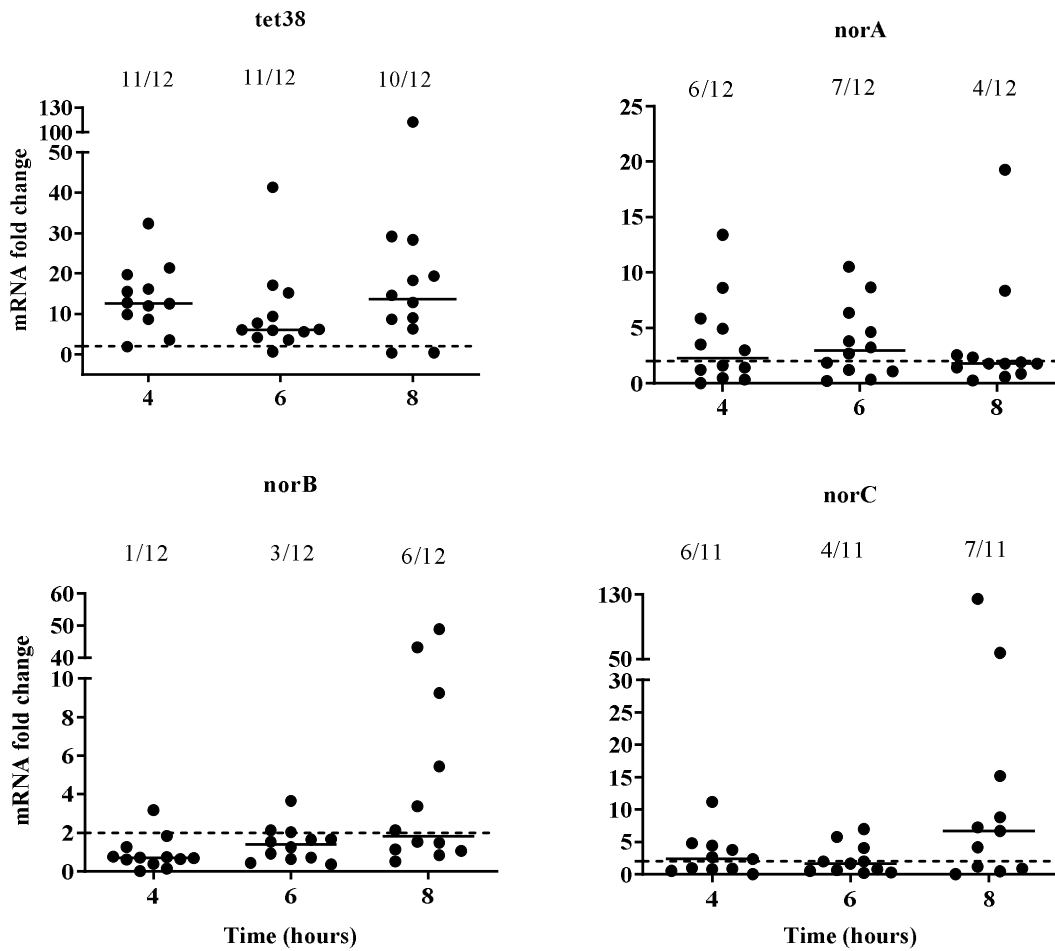

736

737

738 **Figure 5:** The over-expression of *S. aureus* *nor* family genes induced by *P. aeruginosa*. Mono-  
739 and coculture with twelve clinical strain pairs were performed. RNAs were extracted and gene  
740 expression was monitored by RT-qPCR at 4, 6 and 8 hours. The results are represented as fold  
741 change expression. Dotted lines indicate fold change= 2. Numbers above each hour indicate the  
742 number of pairs with a fold change strictly higher than 2.

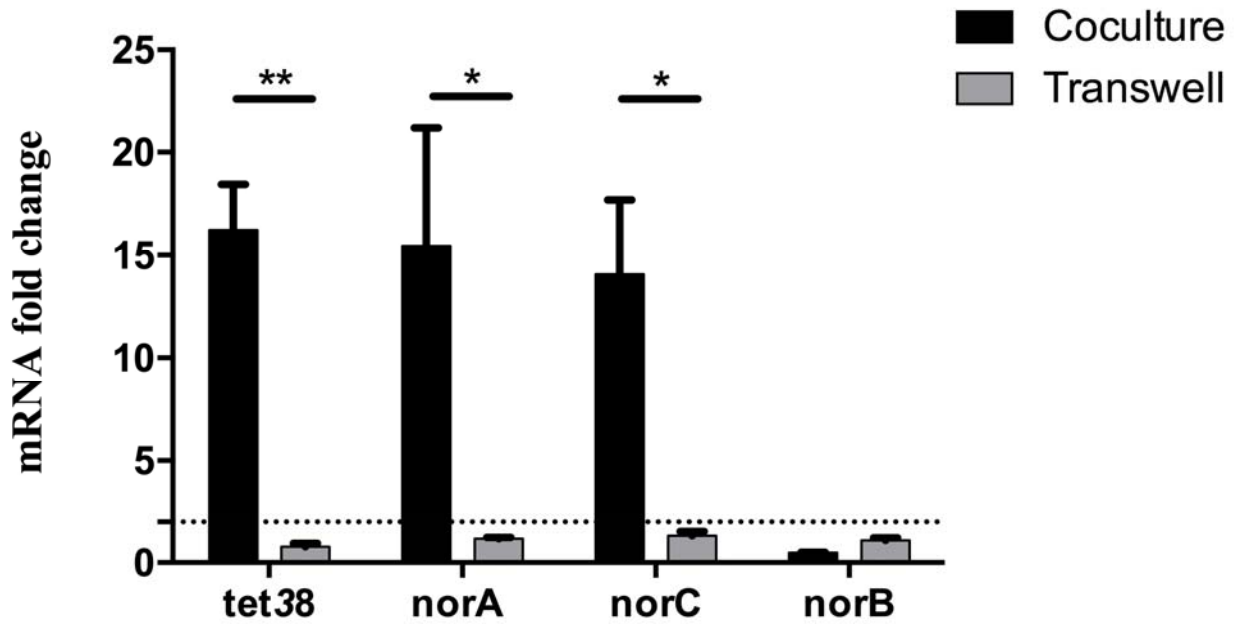

743  
744 **Figure 6:** *S. aureus* *nor* gene over-expression requires close contact with *P. aeruginosa*. *S.*  
745 *aureus* was deposited onto the bottom of wells. *P. aeruginosa* was added either with *S. aureus*  
746 (black) or into the insert of transwells (gray). RNAs were extracted and *nor* gene expression was  
747 monitored by RT-qPCR. Dotted lines represent fold change= 2. The results are shown as the  
748 mean + standard deviation of three independent experiments on SA30-PA30 pairs. Statistical  
749 analysis was performed by unpaired t-test (\* P<0.05, \*\* P<0.01).



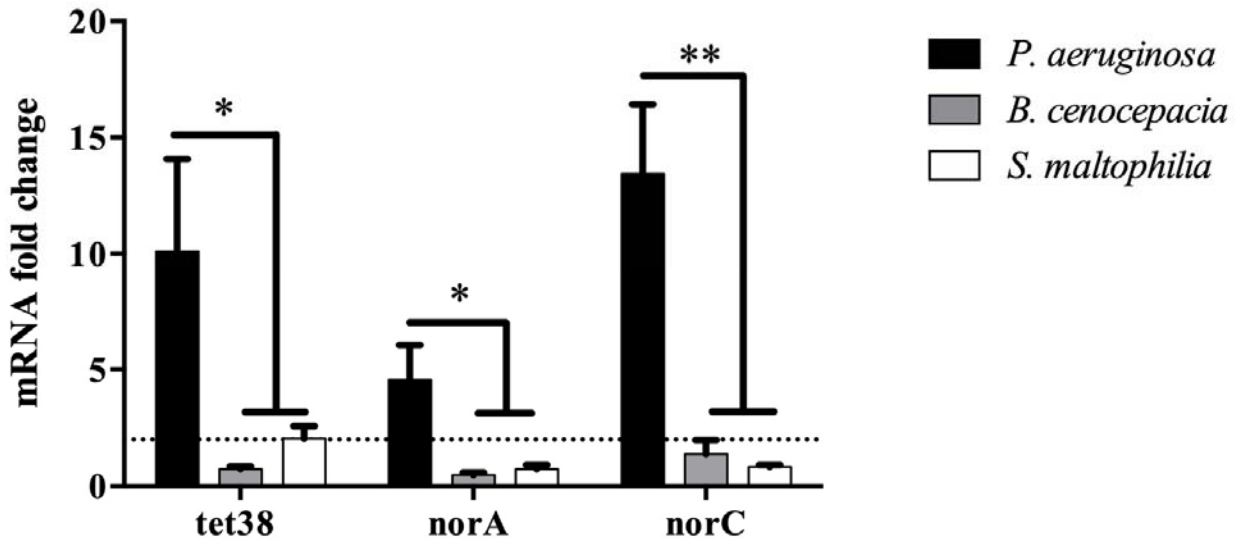

750

751

752 **Figure 7:** The overexpression of *S. aureus* nor genes is specifically induced by *P. aeruginosa*. *S.*

753 *aureus* was mono- and cocultivated with *P. aeruginosa*, *B. cenocepacia* or *S. maltophilia*. RNAs

754 were extracted and gene expression was monitored by RT-qPCR. Dotted lines indicate fold

755 change= 2. The results represent the mean + standard deviation of three independent experiments

756 on SA30-PA30 pairs. Statistical analysis was performed by One-way Anova with Dunnett's

757 multiple test correction (\*  $P_{adj} < 0.05$ , \*\*  $P_{adj} < 0.01$ ).

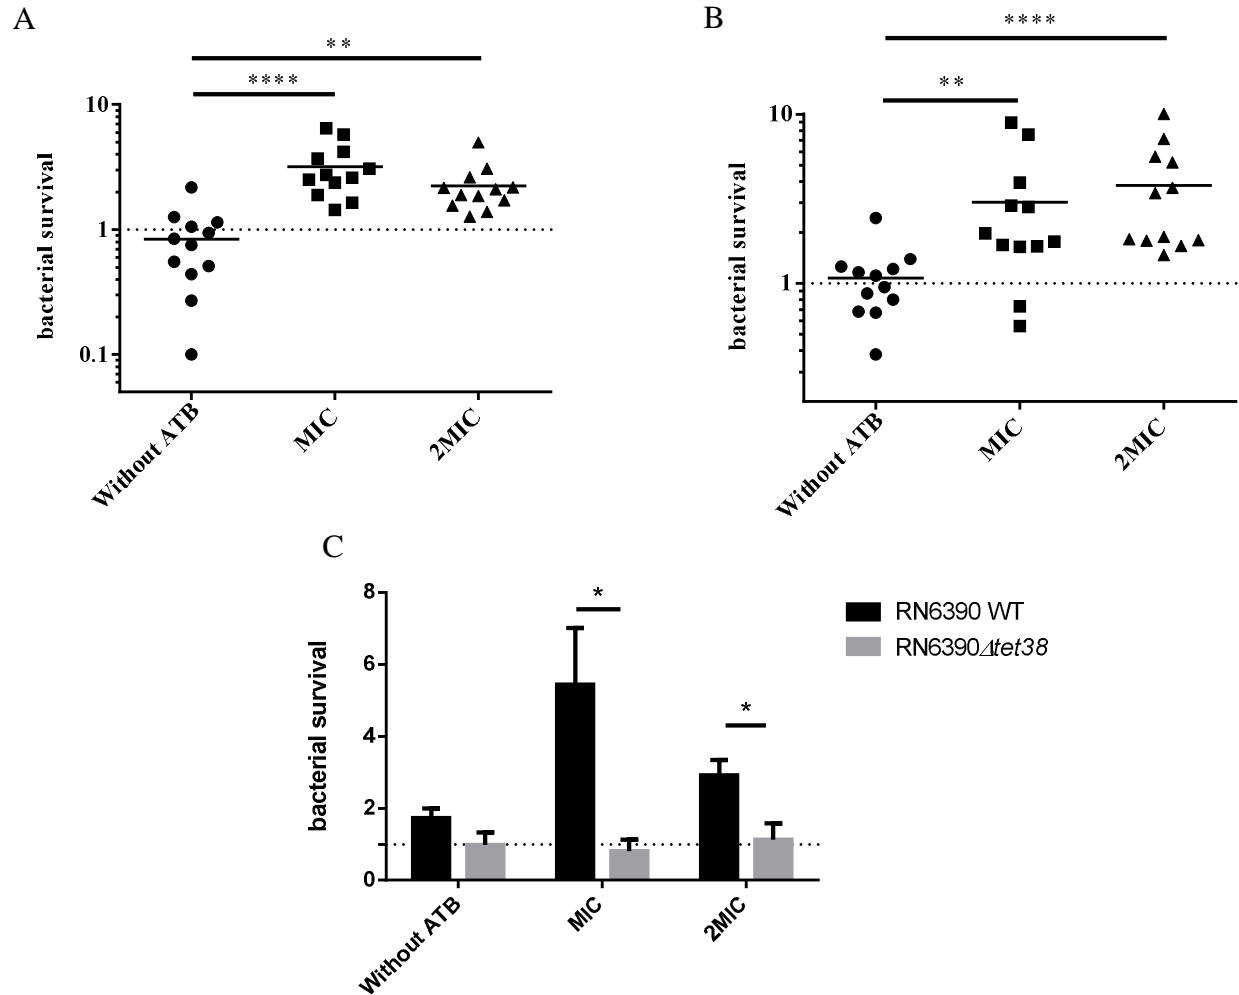

758  
759 **Figure 8:** *S. aureus* antibiotic resistance increases when co-cultivated with *P. aeruginosa*.  
760 Twelve clinical *S. aureus* strains were mono- and cocultivated with coexisting *P. aeruginosa*  
761 strains and exposed to tetracycline (A) and ciprofloxacin (B) at MIC and 2 x MIC. After 5 hours,  
762 cultures were plated on MSA to count remaining *S. aureus*. Bars represent the median and dotted  
763 lines bacterial survival equal to 1. Statistical significance was determined by One-way Anova  
764 with Dunnett's multiple test correction (\*\*  $P_{adj} < 0.01$ , and \*\*\*\*  $P_{adj} < 0.0001$ ). C. *Tet38* is  
765 responsible for the increase of tetracycline resistance induced by *P. aeruginosa*. RN6390 and  
766 isogenic  $\Delta tet38$  derivative were cultivated with and without *P. aeruginosa* and susceptibility to  
767 tetracycline was monitored. Statistical significance was determined by unpaired t-test (\*  $P < 0.05$ )

768 from three independent experiments. All the results are expressed as the number of surviving  
769 bacteria in coculture divided by the number of surviving bacteria in monoculture.

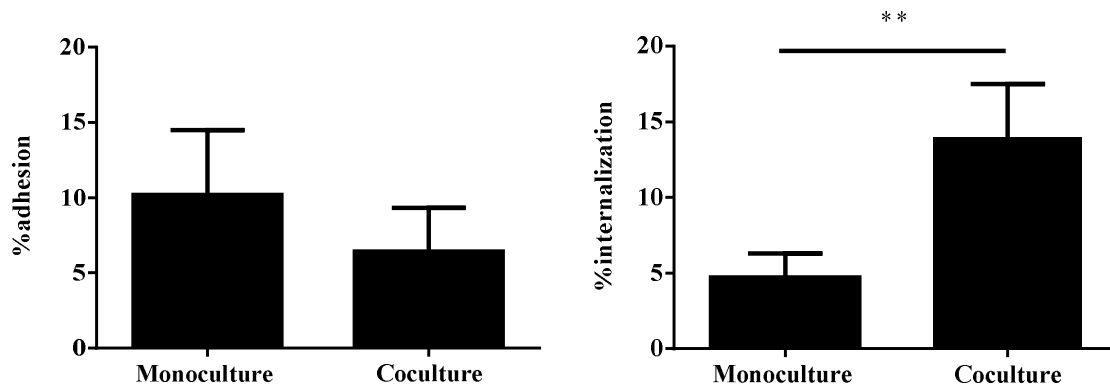

770  
771

772 **Figure 9:** *S. aureus* internalization is increased within A549 epithelial pulmonary cells in the  
773 presence of *P. aeruginosa*. **A.** Adhesion of *S. aureus* onto epithelial cells. A549 cells were  
774 infected at MOI 10:1 for *S. aureus* monoculture and 20:1 for *S. aureus/P. aeruginosa* coculture.  
775 After 2 hours of contact, cells were washed with phosphate buffer saline (PBS) to remove  
776 unattached bacteria and lysed with sterile water. Supernatants were plated on MSA to count *S.*  
777 *aureus*. The results are represented as the percentage of inoculum that adhered. **B.** Internalization  
778 of *S. aureus* within epithelial cells. After 2 hours of contact, cells were treated with antibiotics  
779 and lysostaphine for one hour, lysed with sterile water and bacteria plated on MSA. The results  
780 are represented as the percentage of adhered cells that have internalized. All values represent the  
781 mean + standard deviation from three independent experiments with three strain pairs (SA27-  
782 PA27, SA31-PA31 and SA69-PA69). Statistical significance was determined by unpaired t-test  
783 (\*\* P<0.01).

784 **Table 1:** *S. aureus* and *P. aeruginosa* clinical strains used in this study. 50 couples of *S. aureus*  
 785 and *P. aeruginosa* were collected from 36 patient sputum samples. Some patients presented  
 786 several *P. aeruginosa* isolates, and one patient presented two *S. aureus* isolates. Colony size,  
 787 pigmentation and mucoid phenotype were determined on TSA. Hemolysis type was determined  
 788 on COS. Interaction type was determined by agar plate competition assay as described in the  
 789 materials and methods section. The underlined gray isolates correspond to those used for the  
 790 RNAseq and RT-qPCR analyses. MLST type were determined only for these isolates.

| patients | <i>S. aureus</i> |                |                  |              |       | <i>P. aeruginosa</i> |                |                  |              |        | co-colonization length (days) | type of interaction |
|----------|------------------|----------------|------------------|--------------|-------|----------------------|----------------|------------------|--------------|--------|-------------------------------|---------------------|
|          | strain number    | hemolysis type | Colony size (mm) | pigmentation | MLST  | strain number        | hemolysis type | Colony size (mm) | pigmentation | mucoid |                               |                     |
| 1        | SA2597           | γ              | 1                | none         |       | PA2596               | β              | 4                | Yellow       | yes    | 1544                          | competition         |
| 2        | SA2599           | β              | 3                | none         | CC188 | PA2600               | γ              | 5                | Yellow       | yes    | 1902                          | coexistence         |
| 3        | SA27             | β              | 2                | none         | CC398 | PA27                 | γ              | 3                | none         | no     | 295                           | coexistence         |
| 4        | SA30             | β              | 2                | none         | CC188 | PA30                 | γ              | 1,2              | none         | no     | 133                           | coexistence         |
| 5        | SA31             | β              | 3                | none         | CC15  | PA31                 | γ              | 1,1              | none         | yes    | 921                           | coexistence         |
| 6        | SA42             | γ              | 2                | none         | CC30  | PA42                 | γ              | 20               | Yellow       | yes    | ?                             | coexistence         |
| 7        | SA69             | β              | 3                | none         | CC25  | PA69                 | β              | 2,1              | none         | yes    | 92                            | coexistence         |
| 8        | SA80             | β              | 2                | none         | CC15  | PA80A                | α              | 2,2              | Green        | yes    | 623                           | coexistence         |
|          |                  |                |                  |              |       | PA80B                | α              | 6                | none         | yes    | 623                           | coexistence         |
| 9        | SA82             | β              | 4                | none         | CC45  | PA82                 | γ              | 4                | none         | yes    | ?                             | coexistence         |
| 10       | SA146            | γ              | 2                | none         | CC88  | PA146                | γ              | 4,5              | Green        | yes    | 928                           | coexistence         |
| 11       | SA147            | β              | 2                | none         |       | PA147A               | γ              | 2                | Green        | no     | ?                             | competition         |
|          |                  |                |                  |              |       | PA147B               | γ              | 1,4              | none         | no     |                               | competition         |
| 12       | SA148            | γ              | 1 à 2            | none         |       | PA148A               | β              | 7                | none         | yes    | 839                           | competition         |
|          |                  |                |                  |              |       | PA148B               | β              | 14               | Green        | yes    |                               | coexistence         |
| 13       | SA150            | β              | 2                | none         |       | PA150                | γ              | 1                | none         | no     | 380                           | coexistence         |
| 14       | SA151            | β              | 2                | none         |       | PA151A               | α              | 4,5              | Brown        | yes    | 538                           | coexistence         |
|          |                  |                |                  |              |       | PA151B               | β              | 4                | Yellow       | yes    |                               | coexistence         |
| 15       | SA152            | β              | 3                | none         | CC8   | PA152                | γ              | 13               | none         | yes    | 991                           | coexistence         |
| 16       | SA153            | β              | 3                | none         | CC398 | PA153A               | β              | 3                | none         | no     | 967                           | coexistence         |
|          |                  |                |                  |              |       | PA153B               | β              | 2,5              | Green        | yes    |                               | coexistence         |
| 17       | SA154            | γ              | 2                | none         |       | PA154A               | γ              | 35               | none         | yes    | 595                           | coexistence         |
| 18       | SA155            | β              | 2                | none         |       | PA154B               | γ              | 5                | Green        | yes    |                               | coexistence         |
| 19       | SA156            | β              | 2                | none         | CC398 | PA155                | α              | 11               | Green        | yes    | 1256                          | competition         |
| 20       | SA157            | β              | 2                | none         |       | PA156                | α              | 2,1              | none         | yes    | 49                            | coexistence         |
| 21       | SA158            | γ              | 1 à 2            | none         |       | PA157                | β              | 5                | Green        | yes    | ?                             | competition         |
| 22       | SA159            | β              | <1 SCV (1,5)*    | none         |       | PA158                | β              | 6                | Green        | yes    | ?                             | competition         |
|          |                  |                |                  |              |       | PA159A               | β              | 5                | none         | yes    | 1353                          | competition         |
|          |                  |                |                  |              |       | PA159B               | β              | 18               | Green        | yes    |                               | competition         |
| 23       | SA160            | γ              | <1 SCV (1,1)*    | none         |       | PA160A               | β              | 5                | Green        | yes    | 1332                          | competition         |
|          |                  |                |                  |              |       | PA160B               | β              | 10               | Yellow       | yes    |                               | competition         |
| 24       | SA161            | β              | 2                | none         |       | PA161                | α              | 2                | none         | no     | 1043                          | coexistence         |
| 25       | SA165            | β              | 3                | none         |       | PA165A               | β              | 3,9              | none         | yes    | 343                           | coexistence         |
|          |                  |                |                  |              |       | PA165B               | β              | 4,1              | none         | yes    |                               | coexistence         |
| 26       | SA166            | γ              | 2                | none         |       | PA166A               | α              | 4                | Green        | yes    | 1355                          | coexistence         |
|          |                  |                |                  |              |       | PA166B               | α              | 4,5              | Green        | yes    |                               | coexistence         |
| 27       | SA167            | β              | 3                | none         |       | PA167                | α              | 13               | Green        | yes    | 938                           | competition         |
| 28       | SA168A           | β              | 2                | none         |       | PA168                | γ              | 4                | none         | yes    | 294                           | competition         |
|          | SA168B           | β              | 2                | none         |       |                      |                |                  |              |        |                               | competition         |
| 29       | SA169            | β              | 4                | none         |       | PA169                | γ              | 3,5              | none         | no     | 904                           | coexistence         |

|    |       |          |       |      |        |          |     |        |     |      |             |
|----|-------|----------|-------|------|--------|----------|-----|--------|-----|------|-------------|
| 30 | SA171 | $\beta$  | 1 à 2 | none | PA171  | $\beta$  | 1,1 | none   | yes | 601  | coexistence |
| 31 | SA177 | $\beta$  | 3     | none | PA177  | $\gamma$ | 2   | none   | yes | 1380 | coexistence |
| 32 | SA178 | $\beta$  | 3     | none | PA178  | $\beta$  | 2,5 | none   | yes | 519  | coexistence |
| 33 | SA179 | $\beta$  | 1 à 2 | none | PA179  | $\beta$  | 3   | none   | yes | 91   | competition |
| 34 | SA181 | $\beta$  | 4     | none | PA181  | $\beta$  | 6   | none   | yes | 1096 | competition |
|    |       |          |       | none | PA182A | $\beta$  | 5   | Yellow | yes |      | competition |
| 35 | SA182 | $\gamma$ | 2     | none | PA182B | $\alpha$ | 7   | none   | yes | 987  | competition |
|    |       |          |       | none | PA182C | $\beta$  | 4,2 | none   | yes |      | coexistence |
| 36 | SA186 | $\beta$  | 2     | none | PA186  | $\beta$  | 3   | none   | yes | 623  | competition |

791 \*, colony size after 48h incubation

792 ?, colonization time before sampling could not be determined for these patients.
